# Supplementary material for: CDDO-Me Abrogates Aberrant Mitochondrial Elongation in Clasmatodendritic Degeneration by Regulating NF-κB-PDI-Mediated S-Nitrosylation of DRP1
Source: MDPI journal article supplement (doi:10.3390/ijms24065875), 2023-03-20
Supplement: s1 [file s1]

## **Supplementary information**

### **CDDO-Me Abrogates Aberrant Mitochondrial Elongation in Clasmatodendritic Degeneration by Regulating NF- $\kappa$ B-PDI-Mediated S-Nitrosylation of DRP1**

**Duk-Shin Lee** <sup>1,2</sup>, **Tae-Hyun Kim** <sup>1,2</sup>, **Hana Park** <sup>1,2</sup> and **Ji-Eun Kim** <sup>1,2,\*</sup>

1 Department of Anatomy and Neurobiology, College of Medicine, Hallym University, Chuncheon 24252,  
Republic of Korea

2 Institute of Epilepsy Research, College of Medicine, Hallym University, Chuncheon 24252, Republic of Korea

\* Correspondence: jieunkim@hallym.ac.kr; Tel.: +82-33-248-2522; Fax: +82-33-248-2525

**Fig. 2B**

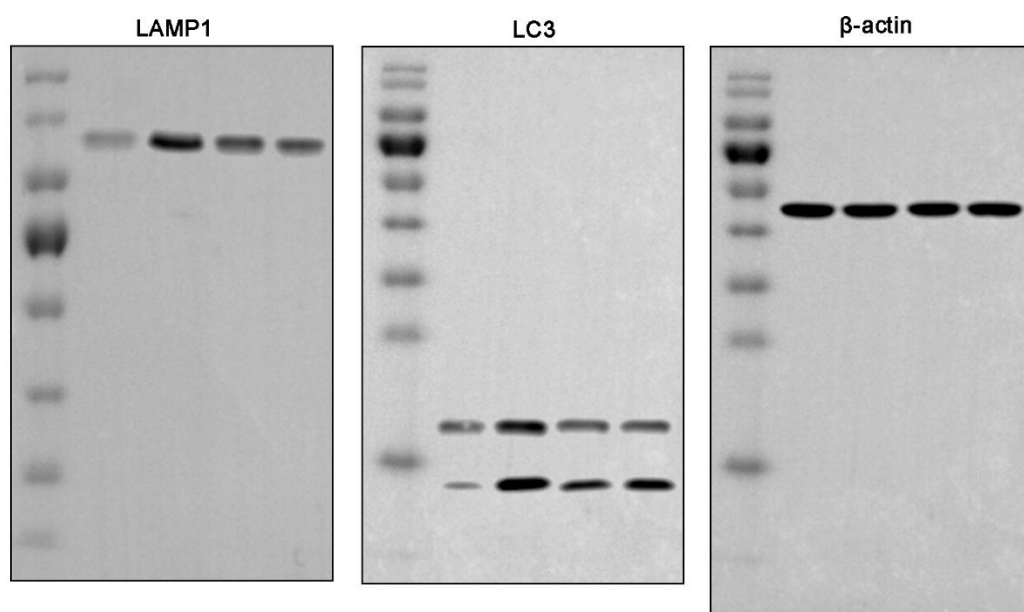

**Supplementary Figure S1.** Full-length gel images of Western blot data in Figure 2B.

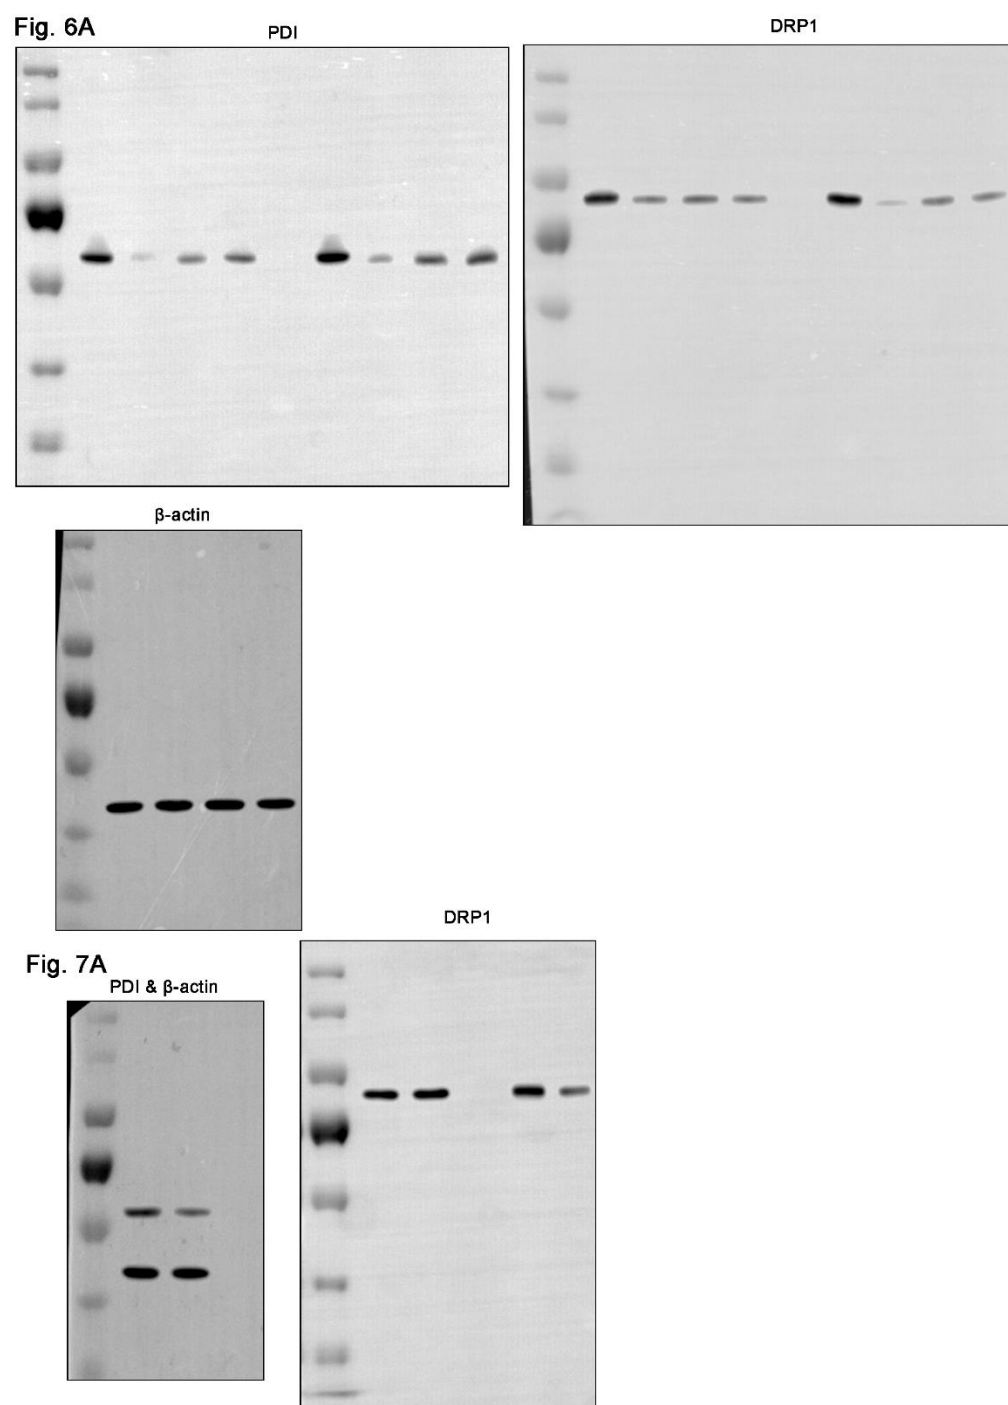

**Supplementary Figure S2.** Full-length gel images of Western blot data in Figures 6A and 7A.
